# Supplementary material for: Lipid monolayer dilatational mechanics during microbubble gas exchange
Source: Royal Society of Chemistry journal article supplement (doi:10.1039/c2sm07437k), 2012-01-01
Supplement: c2sm07437k.pdf [file c2sm07437k.pdf]

## Supplemental Information

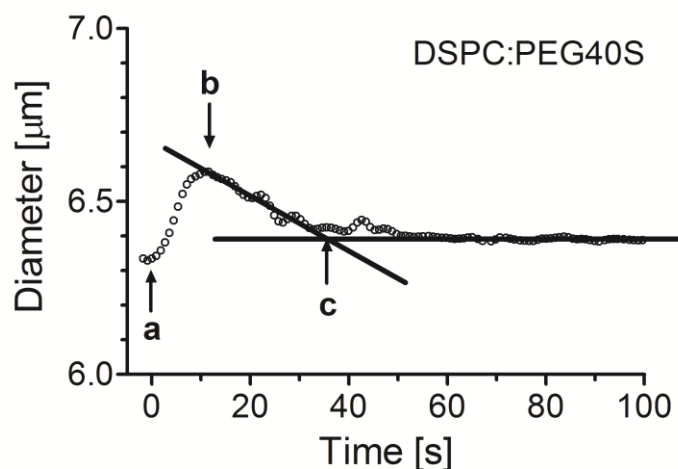

Figure S1: Representative diameter time curve of a DSPC:PEG40S microbubble showing the determination of the primary stability diameter,  $D_{S1}$ . A tangent line was drawn for the initial dissolution of the microbubble and the subsequent plateau in microbubble diameter. The intersection of the two lines indicated the  $D_{S1}$  value.

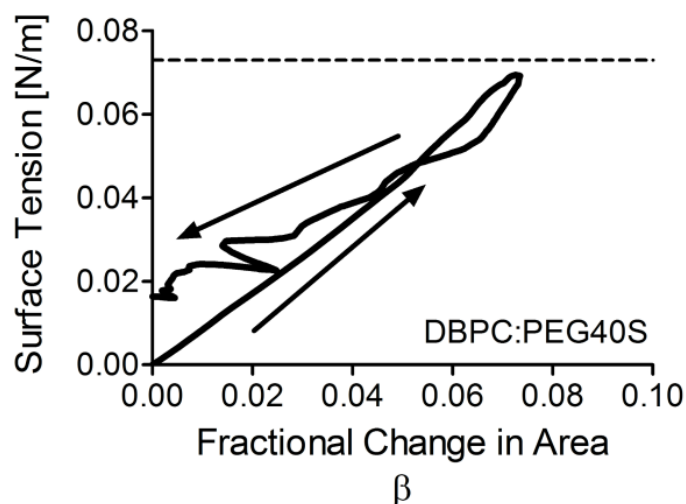

Figure S2: An example of a linear stress-strain curve for a DBPC:PEG40S microbubble.
